# Supplementary material for: Prediction of recurrent stroke among ischemic stroke patients with atrial fibrillation: Development and validation of a risk score model
Source: PubMed Central journal article supplement (PMC8500448; doi:10.1371/journal.pone.0258377), 2021-10-08
Supplement: pone.0258377.s001.pdf [file pone.0258377.s001.pdf]

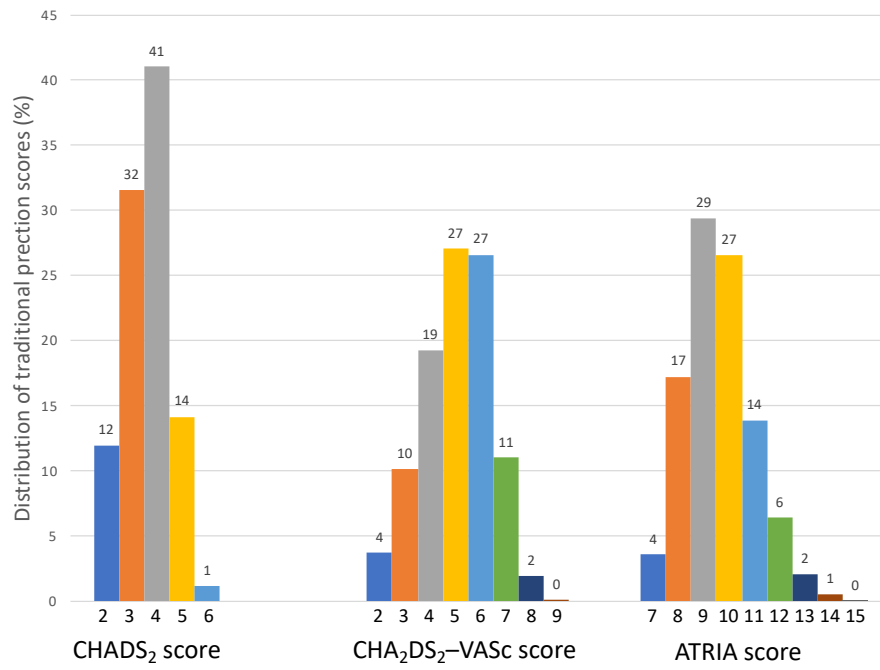

S1 Fig. Distribution of CHADS<sub>2</sub>, CHA<sub>2</sub>DS<sub>2</sub>-VASc, and ATRIA scores in the developmental dataset
