# Supplementary material for: Prediction of recurrent stroke among ischemic stroke patients with atrial fibrillation: Development and validation of a risk score model
Source: PubMed Central journal article supplement (PMC8500448; doi:10.1371/journal.pone.0258377), 2021-10-08
Supplement: pone.0258377.s002.pdf [file pone.0258377.s002.pdf]

### CHADS<sub>2</sub> score

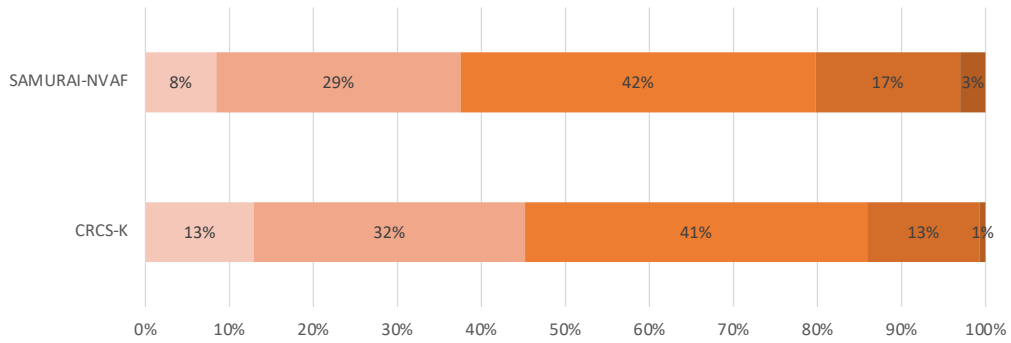

|   | CRCS-K | SAMURAI-NVAF |
|---|--------|--------------|
| 2 | 13%    | 8%           |
| 3 | 32%    | 29%          |
| 4 | 41%    | 42%          |
| 5 | 13%    | 17%          |
| 6 | 1%     | 3%           |

### CHA<sub>2</sub>DS<sub>2</sub>-VASc score

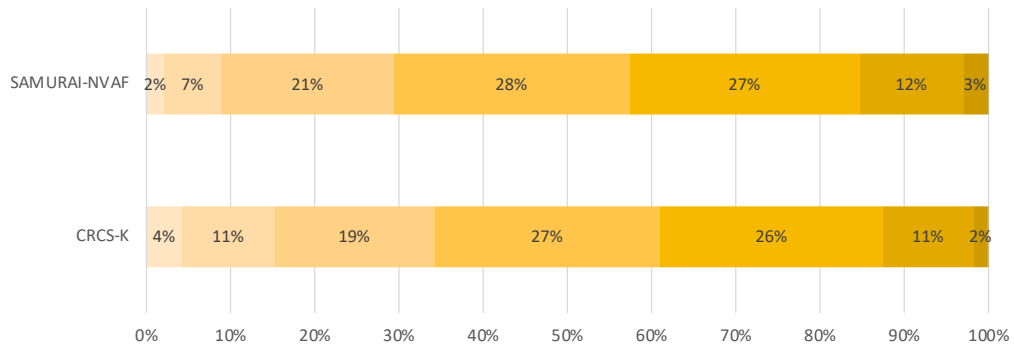

|   | CRCS-K | SAMURAI-NVAF |
|---|--------|--------------|
| 2 | 4%     | 2%           |
| 3 | 11%    | 7%           |
| 4 | 19%    | 21%          |
| 5 | 27%    | 28%          |
| 6 | 26%    | 27%          |
| 7 | 11%    | 12%          |
| 8 | 2%     | 3%           |
| 9 | 0%     | 0%           |

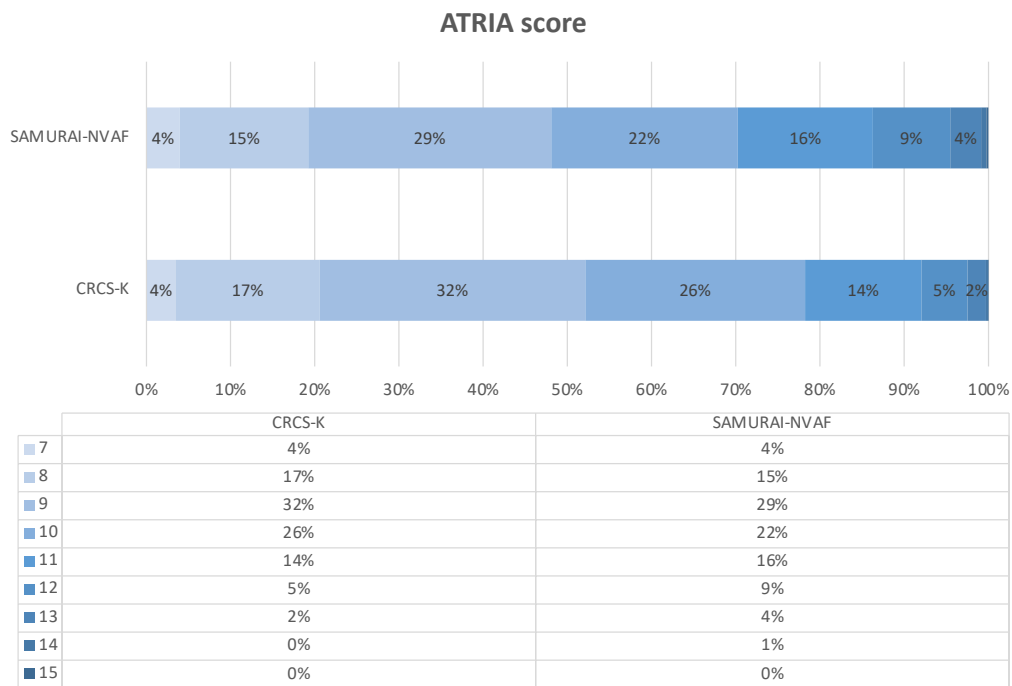

S2 Fig. Distribution of CHADS<sub>2</sub>, CHA<sub>2</sub>DS<sub>2</sub>-VASc, and ATRIA scores in the developmental dataset by countries
