# Supplementary material for: Prediction of recurrent stroke among ischemic stroke patients with atrial fibrillation: Development and validation of a risk score model
Source: PubMed Central journal article supplement (PMC8500448; doi:10.1371/journal.pone.0258377), 2021-10-08
Supplement: pone.0258377.s003.pdf [file pone.0258377.s003.pdf]

S1 Table. Clinical profile of the external validation dataset

|                            |                                                            |
|----------------------------|------------------------------------------------------------|
|                            | External validation set (CRCS-K, 2015 - 2018)<br>(N, 3668) |
| age                        | 74.0 ± 10.2                                                |
| male                       | 1922 (52.4%)                                               |
| Onset to arrival (d)       |                                                            |
| ≤24 hours                  | 2916 (79.5%)                                               |
| 1 - 2 day                  | 521 (14.2%)                                                |
| ≥3 days                    | 231 (6.3%)                                                 |
| BMI                        | 23.5 ± 3.5                                                 |
| TIA as an index stroke     | 88 (2.4%)                                                  |
| Pre-stroke mRS≥1           | 856 (23.3%)                                                |
| NIHSS score                | 7 [2 - 15]                                                 |
| Hypertension               | 2609 (71.1%)                                               |
| Diabetes                   | 1112 (30.3%)                                               |
| dyslipidemia               | 1005 (27.4%)                                               |
| Smoking                    | 954 (26.0%)                                                |
| Newly detected Af          | 1710 (46.6%)                                               |
| pre-stroke antiplatelets   | 1203 (32.8%)                                               |
| pre-stroke anticoagulation | 818 (22.3%)                                                |
| Arterial occlusions        |                                                            |
| ICA or MCA                 | 1792 (48.9%)                                               |
| Vertebro-basilar arteries  | 287 (7.8%)                                                 |
| Others                     | 339 (9.2%)                                                 |
| Discharge medications      |                                                            |
| aspirin                    | 832 (22.7%)                                                |
| clopidogrel                | 320 (8.7%)                                                 |
| cilostazol                 | 105 (2.9%)                                                 |
| warfarin                   | 780 (23.1%)                                                |
| apixaban                   | 718 (21.2%)                                                |
| dabigatran                 | 560 (16.6%)                                                |
| rivaroxaban                | 511 (15.1%)                                                |
| Laboratory information     |                                                            |
| White blood cell count     | 8219 ± 2991                                                |
| hemoglobin                 | 13.4 ± 2.1                                                 |
| Total cholesterol          | 158 ± 38                                                   |
| Creatinine                 | 1.08 ± 1.01                                                |
| Initial glucose at arrival | 142 ± 26                                                   |
| Systolic blood pressure    | 143 ± 26                                                   |

|                                              |                 |
|----------------------------------------------|-----------------|
| Diastolic blood pressure                     | 83 ± 16         |
| CHADS <sub>2</sub> score                     | 4 [3 - 4]       |
| CHA <sub>2</sub> DS <sub>2</sub> -VASc score | 5 [4 - 6]       |
| ATRIA score                                  | 9 [9 - 10]      |
| mRS score at discharge                       |                 |
| 0                                            | 438 (11.9%)     |
| 1                                            | 652 (17.8%)     |
| 2                                            | 620 (16.9%)     |
| 3                                            | 481 (13.1%)     |
| 4                                            | 719 (19.6%)     |
| 5                                            | 758 (20.7%)     |
| Recurrent stroke                             | 157 (4.3%)      |
| F/U duration for stroke                      | 362 [161 - 365] |
| Death up to 1 year                           | 400 (10.9%)     |
| F/U duration for death (day)                 | 364 [259 - 365] |
